# Supplementary material for: Real-world outcomes from a series of patients with late onset Pompe disease who switched from alglucosidase alfa to avalglucosidase alfa
Source: PubMed Central journal article supplement (PMC10834735; doi:10.3389/fgene.2024.1309146), 2024-01-19

## *Supplementary Material*

### 1.1 Supplementary Tables

1.1.1 **Supplementary Table 1.** CK and AST trends. Baseline values are the last known values prior to initiating ERT. Alglucosidase values are the last known values prior to the switch. Avalglucosidase values are the most recent values available in the chart. Other timepoints were taken into account when selecting these to ensure that general trends were reflected. Full data is available in Supplementary Figure 1.

| Patient/Sex | CK (30-220 U/L) |      |       | AST (15-41 U/L) |      |       |
|-------------|-----------------|------|-------|-----------------|------|-------|
|             | Baseline        | Alg. | Aval. | Baseline        | Alg. | Aval. |
| 1/F         | 541             | 337  | 158   | 56              | 43   | 29    |
| 2/F         | –               | 278  | 143   | –               | 30   | 21    |
| 3/F         | 539             | 429  | 382   | 45              | 42   | 34    |
| 4/M         | 301             | 138  | 123   | 38              | 21   | 20    |
| 5/F         | 614             | 374  | 152   | –               | 60   | 31    |
| 6/F         | –               | 195  | 83    | –               | 28   | 17    |
| 7/F         | –               | 211  | 200   | –               | 88   | 33    |
| 8/M         | 235             | 209  | 205   | 45              | 47   | 27    |
| 9/M         | 470             | 271  | 188   | 52              | 30   | 26    |
| 11/F        | 468             | 242  | 216   | 59              | 42   | 26    |
| 12/F        | 269             | 210  | 83    | 28              | 19   | 19    |
| 13/F        | –               | –    | 14    | –               | 21   | 20    |
| 14/M        | 1992            | 955  | 657   | 87              | 55   | 42    |
| 15/M        | 950             | 336  | 232   | 305             | 67   | 42    |
| 16/M        | 966             | 913  | –     | 315             | 61   | –     |

1.1.2 **Supplementary Table 2.** ALT and Hex4 Trends. Baseline values are the last known values prior to initiating ERT. Alglucosidase values are the last known values prior to the switch. Avalglucosidase values are the most recent values available in the chart. Other timepoints were taken into account when selecting these to ensure that general trends were reflected. Full data is available in Supplementary Figure 1.

| Patient/Sex | ALT (5-40 U/L) |      |       | Hex4 ( $\leq 3.0$ mmol/mol Cr) |      |       |
|-------------|----------------|------|-------|--------------------------------|------|-------|
|             | Baseline       | Alg. | Aval. | Baseline                       | Alg. | Aval. |
| 1/F         | 72             | 53   | 32    | –                              | 4.2  | 1.83  |
| 2/F         | –              | 24   | 28    | –                              | 4.7  | 2.8   |
| 3/F         | 45             | 38   | 30    | 8.09                           | 2.6  | 1.1   |
| 4/M         | 32             | 22   | 18    | 2.9                            | 2.2  | 1.8   |
| 5/F         | –              | 67   | 34    | 8                              | 4.6  | 1.6   |
| 6/F         | –              | 17   | 11    | –                              | 3.5  | 2     |
| 7/F         | –              | 129  | 30    | –                              | 4.8  | 3.6   |
| 8/M         | 91             | 44   | 26    | 8.7                            | 4.5  | –     |
| 9/M         | 60             | 36   | 23    | 4.3                            | 1.6  | 1.4   |
| 11/F        | 35             | 24   | 14    | 3.2                            | 2.4  | 0.9   |
| 12/F        | 53             | 44   | 30    | 10.7                           | 8.5  | 4.4   |
| 13/F        | –              | 42   | 23    | –                              | 25   | 5.7   |
| 14/M        | 74             | 53   | 42    | 4                              | 3.9  | 1.7   |
| 15/M        | 233            | 95   | 38    | –                              | 5    | 2.6   |
| 16/M        | 285            | 52   | –     | –                              | 3.2  | 2.8   |

1.1.3 **Supplementary Table 3.** Anti-alglucosidase Antibody Titers. Most recent and peak anti-alglucosidase antibody titers with months before switch to avalglucosidase.

| <b>Patient/Sex</b> | <b>Most Recent Alglucosidase</b> | <b>Months Before Switch</b> | <b>Peak Alglucosidase</b> | <b>Months Before Switch</b> |
|--------------------|----------------------------------|-----------------------------|---------------------------|-----------------------------|
| 1/F                | Negative                         | 2.69                        | 3200                      | 16.95                       |
| 2/F                | Negative                         | 3.68                        | 3200                      | 30.82                       |
| 3/F                | Negative                         | 2.30                        | Negative                  | 2.30                        |
| 4/M                | 800                              | 0.03                        | 6400                      | 21.59                       |
| 5/F                | ND                               | ND                          | ND                        | ND                          |
| 6/F                | 12800                            | 2.50                        | 12800                     | 2.50                        |
| 7/F                | 400                              | 3.94                        | 400                       | 3.94                        |
| 8/M                | Negative                         | 1.51                        | 1600                      | 64.49                       |
| 9/M                | 200                              | 4.11                        | 200                       | 4.11                        |
| 11/F               | ND                               | ND                          | ND                        | ND                          |
| 12/F               | 800                              | 2.63                        | 800                       | 2.63                        |
| 13/F               | ND                               | ND                          | ND                        | ND                          |
| 14/M               | 6400                             | 3.71                        | 6400                      | 3.71                        |
| 15/M               | ND                               | ND                          | ND                        | ND                          |
| 16/M               | ND                               | ND                          | ND                        | ND                          |

1.1.4 **Supplementary Table 4.** Anti-avalglucosidase Antibody Titers. Most recent and peak anti-avalglucosidase antibody titers with months since switch to avalglucosidase.

| <b>Patient/Sex</b> | <b>Most Recent<br/>Avalglucosidase</b> | <b>Months After<br/>Switch</b> | <b>Peak<br/>Avalglucosidase</b> | <b>Months After<br/>Switch</b> |
|--------------------|----------------------------------------|--------------------------------|---------------------------------|--------------------------------|
| 1/F                | Negative                               | 9.27                           | Negative                        | 9.27                           |
| 2/F                | Negative                               | 8.28                           | Negative                        | 8.28                           |
| 3/F                | 800                                    | 3.32                           | 800                             | 3.32                           |
| 4/M                | 800                                    | 11.99                          | 800                             | 11.99                          |
| 5/F                | 3200                                   | 108.22                         | 3200                            | 108.22                         |
| 6/F                | Negative                               | 9.46                           | Negative                        | 9.46                           |
| 7/F                | Negative                               | 51.25                          | 3200                            | 34.04                          |
| 8/M                | ND                                     | ND                             | ND                              | ND                             |
| 9/M                | 400                                    | 3.65                           | 400                             | 3.65                           |
| 11/F               | 25600                                  | 20.34                          | 102400                          | 11.04                          |
| 12/F               | Negative                               | 33.25                          | 400                             | 3.02                           |
| 13/F               | Negative                               | 9.53                           | Negative                        | 9.53                           |
| 14/M               | 25600                                  | 12.39                          | 25600                           | 12.39                          |
| 15/M               | Negative                               | 10.91                          | Negative                        | 10.91                          |
| 16/M               | ND                                     | ND                             | ND                              | ND                             |

**1.1.5 Supplementary Table 5.** Quick Motor Function Test (QMFT). Changes in QMFT total score (green improved, blue stable, red declined) with additional breakdown by task item. No MCD or MCID has been established for this test. Scores range from 0 to 64, with a score of 64 indicating normal function.

| Patient ID           | 1F   | 3F   | 9M   | 14M     | 15M  | 16M  | 2F     | 4M          | 6F      | 7F           | 12F      |
|----------------------|------|------|------|---------|------|------|--------|-------------|---------|--------------|----------|
| Severity (per GSGC)  | Mild | Mild | Mild | Mild    | Mild | Mild | Mod    | Sev         | Sev     | Sev          | Sev      |
| Days after switch    | 282  | 101  | 475  | 100 377 | 333  | 72   | 81 252 | 162 365 572 | 103 288 | 366 538 1133 | 971 1376 |
| Total Score          | 50   | 63   | 50   | 60 60   | 64   | 64   | 32 33  | 18 17 16    | 29 27   | 14 13 11     | 24 27    |
| Change from baseline | 2    | 0    | 0    | -1 -1   | 11   | 5    | 0 1    | -3 -4 -5    | 0 -2    | 0 -1 -3      | 3 6      |
| Raising torso        |      |      |      |         | 1    |      |        | -1          | 1       |              |          |
| Neck flex            |      |      |      |         | 1    |      |        | -1          |         | -1           | 1        |
| Hand across midline  |      |      |      |         |      |      |        |             |         | -1           | 1        |
| Hip and knee flex    |      |      |      |         |      |      | -1     |             | 1       | -1           | 1        |
| Extend the legs      |      |      |      |         | 1    | 1    |        |             |         |              |          |
| Sit up               |      |      |      | -1      | 2    |      |        |             |         |              | -1       |
| Extend the arms      |      |      |      |         | 1    |      |        |             | -1      |              | -2 2     |
| Stand from chair     |      |      |      |         |      |      |        |             |         |              |          |
| Stand from half knee |      |      |      |         | 1    | 1    |        |             |         |              |          |
| Squat                |      |      |      |         | 1    | 1    |        |             |         |              |          |
| Stand from squat     |      |      |      |         | 1    | 1    |        |             |         |              |          |
| Pick up object       | 1    |      |      |         |      |      | 1      |             | -1      |              | 2        |
| Single leg stand     |      |      |      |         | 1    | 1    | 1      |             | -1      |              | 1 1      |
| Walking              |      |      |      |         |      |      |        | -1          | -1      |              |          |
| Jumping              | 1    |      |      |         | 1    |      |        |             |         |              |          |
| Stairs               |      |      |      |         |      |      |        | -2          |         |              |          |

**1.1.6 Supplementary Table 6.** 9-hole peg test (9-HPT) results for Patient 13F. Times in seconds for completion of the standard or modified easy grip 9-HPT are listed for patient 13F prior to and after the switch to avalglucosidase alfa.

| <b>Days from switch</b>             | <b>-184</b> | <b>-44</b> | <b>12</b> | <b>286</b> | <b>433</b>      | <b>518</b> |
|-------------------------------------|-------------|------------|-----------|------------|-----------------|------------|
| <b>Easy grip 9-HPT (right hand)</b> | 118         | 110        | 87        | 57         | –               | –          |
| <b>Standard 9-HPT (right hand)</b>  | Unable      | Unable     | Unable    | 98         | 78              | 58         |
| <b>Easy grip 9-HPT (left hand)</b>  | 245         | 162        | 110       | 59         | –               | –          |
| <b>Standard 9-HPT (left hand)</b>   | Unable      | Unable     | Unable    | Unable     | 88 for 6/9 pegs | 116        |

**1.1.7 Supplementary Table 7.** Comfortable gait speeds at each visit before and after the switch from alglucosidase to avalglucosidase. Items in blue met the MDC of 0.15 m/s and the lower MCID cutoff of 18.9% and those in blue with green outline met the most stringent MCID of 31.1%. Two patients (4M and 7F) had changes that were significant using both MCID cutoffs at their most recent visits, but their baseline walking speeds were so slow that these cutoffs were lower than the MDC of 0.15 m/s; patient 4M (in green) met both MCID cutoffs for significant improvement, and patient 7F (in red) met both MCID cutoffs for significant decline.

| Patient              | Severity based on GSGC | Comfortable Gait Speed (m/s) |             |             |             |             |             |             | Change in Gait Speed from baseline to: |         |             |            |             |
|----------------------|------------------------|------------------------------|-------------|-------------|-------------|-------------|-------------|-------------|----------------------------------------|---------|-------------|------------|-------------|
|                      |                        | 2 Prior                      | 1 Prior     | 1 After     | 2 After     | Most recent | At Best     | At Worst    | 1 After                                | 2 After | Most recent | Best after | Worst after |
| 15/M                 | Mild                   |                              | 0.93        | 1.29        |             | 1.29        | 1.29        | 1.29        | 0.36                                   |         | 0.36        | 0.36       | 0.36        |
| 3/F                  | Mild                   |                              | 1.36        | 1.40        |             | 1.40        | 1.40        | 1.40        | 0.04                                   |         | 0.04        | 0.04       | 0.04        |
| 9/M                  | Mild                   | 1.30                         | 1.32        | 1.18        | 1.38        | 1.38        | 1.38        | 1.18        | -0.14                                  | 0.06    | 0.06        | 0.06       | -0.14       |
| 16/M                 | Mild                   | 1.04                         | 1.11        | 1.39        |             | 1.39        | 1.39        | 1.39        | 0.28                                   |         | 0.28        | 0.28       | 0.28        |
| 14/M                 | Mild                   | 1.23                         | 1.50        | 1.45        | 1.41        | 1.41        | 1.45        | 1.41        | -0.05                                  | -0.09   | -0.09       | -0.05      | -0.09       |
| 1/F                  | Mild                   | 1.29                         | 1.19        | 1.33        |             | 1.33        | 1.33        | 1.33        | 0.14                                   |         | 0.14        | 0.14       | 0.14        |
| 5/F                  | Mod                    | 1.52                         | 0.88        | 0.95        | 1.30        | 1.19        | 1.30        | 0.76        | 0.07                                   | 0.42    | 0.31        | 0.42       | -0.12       |
| 2/F                  | Mod                    | 0.93                         | 0.96        | 0.97        | 1.20        | 1.20        | 1.20        | 0.97        | 0.01                                   | 0.24    | 0.24        | 0.24       | 0.01        |
| 6/F                  | Severe                 | 0.22                         | 0.24        | 0.64        | 0.61        | 0.71        | 0.71        | 0.61        | 0.4                                    | 0.37    | 0.47        | 0.47       | 0.37        |
| 7/F                  | Severe                 |                              | 0.32        | 0.34        | 0.33        | 0.20        | 0.34        | 0.20        | 0.02                                   | 0.01    | -0.12       | 0.02       | -0.12       |
| 4/M                  | Severe                 | 0.38                         | 0.32        | 0.35        | 0.41        | 0.42        | 0.41        | 0.35        | 0.03                                   | 0.09    | 0.10        | 0.10       | 0.03        |
| 12/F                 | Severe                 |                              | 0.61        | 0.80        | 0.65        | 0.65        | 0.80        | 0.65        | 0.19                                   | 0.04    | 0.04        | 0.19       | 0.04        |
| <b>Average speed</b> |                        |                              | <b>0.90</b> | <b>1.01</b> | <b>0.84</b> | <b>1.05</b> | <b>1.08</b> | <b>0.96</b> |                                        |         |             |            |             |

## 1.2 Supplementary Figures

**1.2.1 Supplementary Figure 1. Full lab trends.** All lab data available for CK, AST, and Hex4 graphed for all 15 patients by age. Color-coded vertical bars represent the starting points of ERT regimens, as described in Figures 1 and 3.

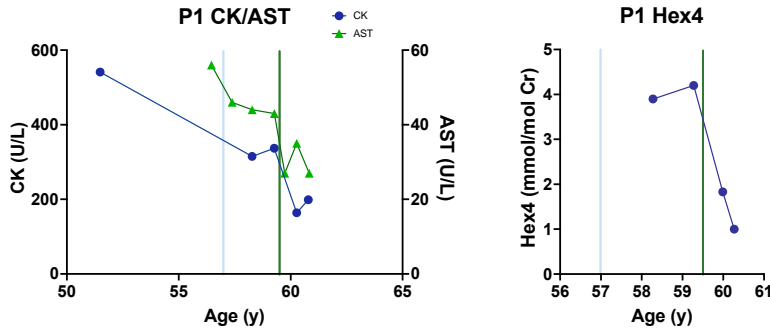

### Antibodies

58.23 y: 3,200 (AI)  
 59.27 y: Neg (AI)  
 59.96 y: Neg (Aval)  
 60.27 y: Neg (Aval)

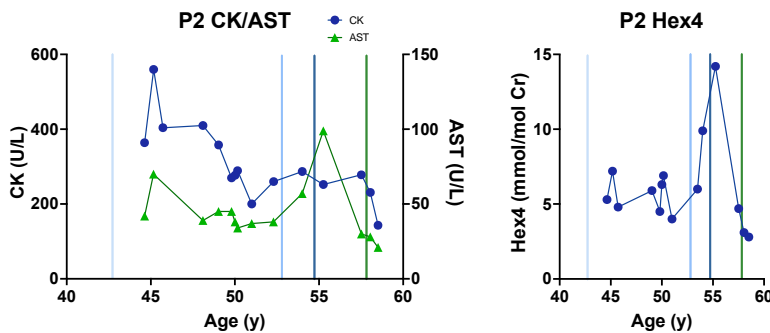

### Antibodies

48.1 y: 1,600 (AI)  
 49.0 y: 800 (AI)  
 49.8 y: 3,200 (AI)  
 51.0 y: 1,600 (AI)  
 52.3 y: 6,400 (AI)  
 54.0 y: 1,600 (AI)  
 55.3 y: 3,200 (AI)  
 57.5 y: Neg (AI)  
 58.5 y: Neg (Aval)

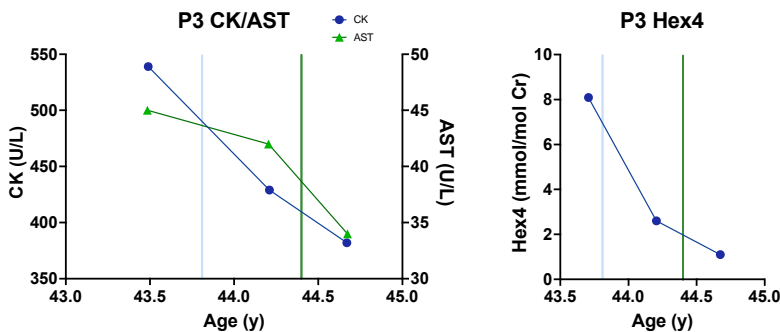

### Antibodies

43.9 y: Neg (AI)  
 44.2 y: Neg (AI)  
 44.7 y: 800 (Aval)

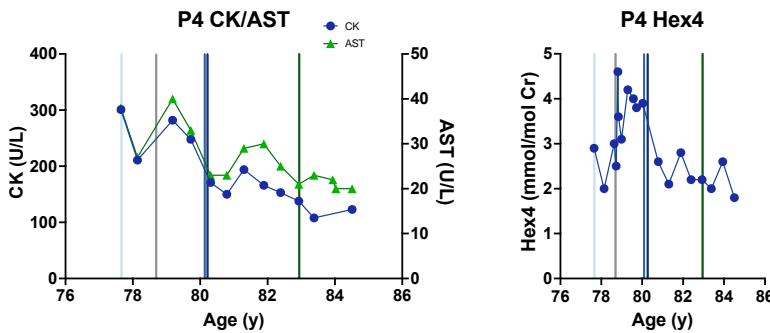

### Antibodies

78.1 y: 6,400 (AI)  
 78.6 y: 1,600 (AI)  
 79.7 y: 1,600 (AI)  
 80.3 y: 6,400 (AI)  
 80.8 y: 3,200 (AI)  
 81.3 y: 800 (AI)  
 82.4 y: 1,600 (AI)  
 82.9 y: 800 (AI)  
 83.4 y: Neg (Aval)  
 83.9 y: 800 (Aval)



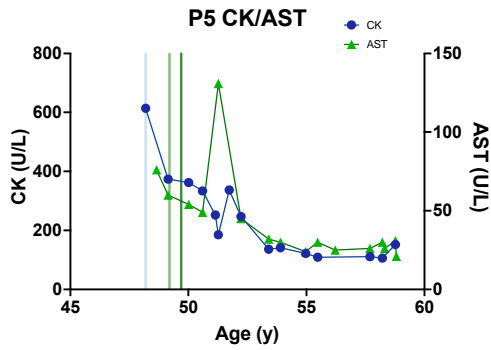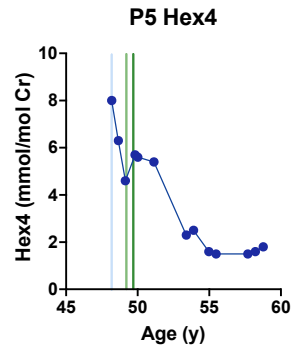

**P5 Antibodies**  
 48.7 y: 800 (AI)  
 49.1 y: 1,600 (AI)  
 52.2 y: 1,600 (AI)  
 53.4 y: 1,600 (AI)  
 53.9 y: 1,600 (AI)  
 57.7 y: 1,600 (Aval)  
 58.2 y: 3,200 (Aval)

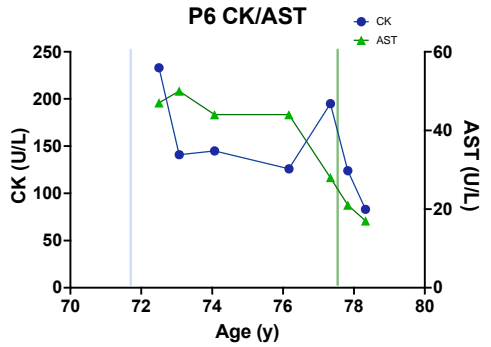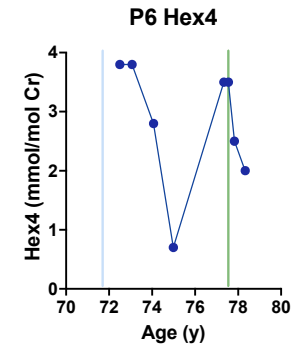

**P6 Antibodies**  
 72.5 y: 800 (AI)  
 73.0 y: 12,800 (AI)  
 74.1 y: 6,400 (AI)  
 75.0 y: 12,800 (AI)  
 77.3 y: 12,800 (AI)  
 77.8 y: Neg (Aval)  
 78.3 y: Neg (Aval)

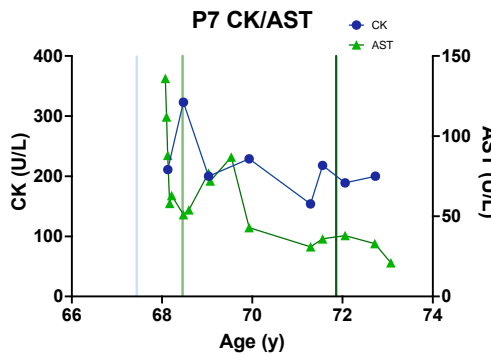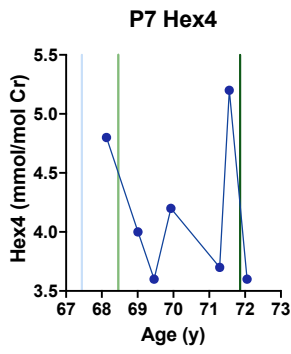

**P7 Antibodies**  
 68.1 y: 400 (AI)  
 68.5 y: 400 (AI)  
 71.3 y: 3,200 (AI)  
 72.1 y: 1,600 (Aval)  
 72.7 y: Neg (Aval)

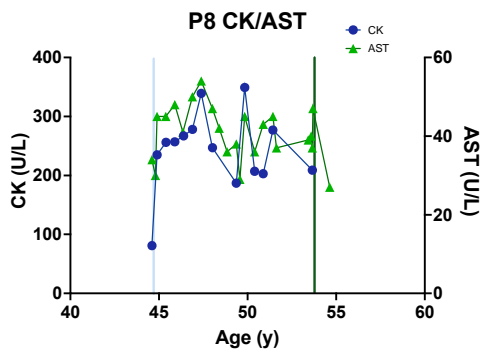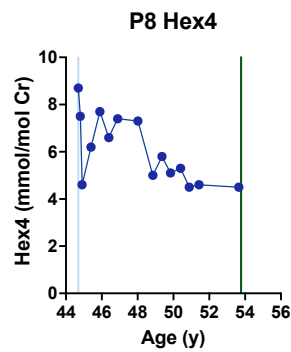

**P8 Antibodies**  
 44.9 y: 200 (AI)  
 45.4 y: 200 (AI)  
 46.9 y: 400 (AI)  
 47.4 y: 1,600 (AI)  
 48.0 y: 1,600 (AI)  
 49.4 y: 400 (AI)  
 49.8 y: 100 (AI)  
 50.4 y: 800 (AI)  
 50.9 y: 1,600 (AI)  
 51.4 y: Neg (AI)  
 53.7 y: Neg (AI)

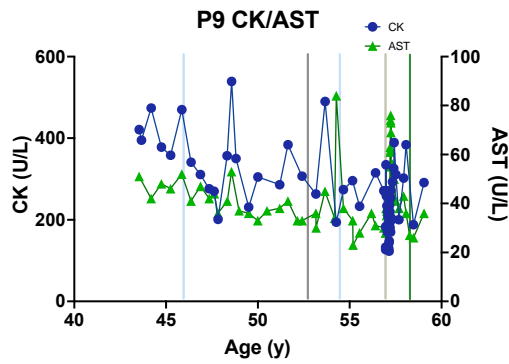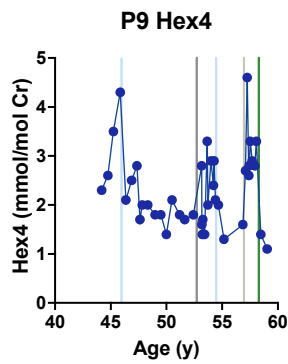

**P9 Antibodies**

|                     |                    |
|---------------------|--------------------|
| 47.6 y: 6,400 (AI)  | 55.5 y: 400 (AI)   |
| 47.7 y: 12,800 (AI) | 56.4 y: 200 (AI)   |
| 47.8 y: 6,400 (AI)  | 56.9 y: 400 (AI)   |
| 48.3 y: 12,800 (AI) | 57.0 y: 200 (AI)   |
| 48.6 y: 6,400 (AI)  | 57.1 y: 200 (AI)   |
| 48.8 y: 6,400 (AI)  | 57.2 y: 200 (AI)   |
| 49.0 y: 6,400 (AI)  | 57.4 y: 200 (AI)   |
| 49.5 y: 1,600 (AI)  | 57.5 y: 200 (AI)   |
| 50.5 y: 1,600 (AI)  | 57.7 y: 200 (AI)   |
| 51.6 y: 1,600 (AI)  | 57.9 y: 200 (AI)   |
| 53.2 y: 1,600 (AI)  | 58.5 y: 400 (Aval) |
| 54.7 y: 3,200 (AI)  | 58.6 y: 400 (Aval) |
| 55.2 y: 800 (AI)    | 59.0 y: 400 (Aval) |

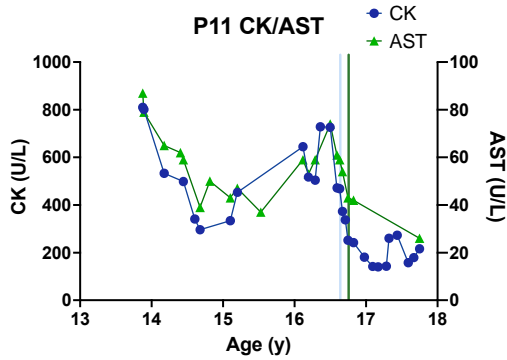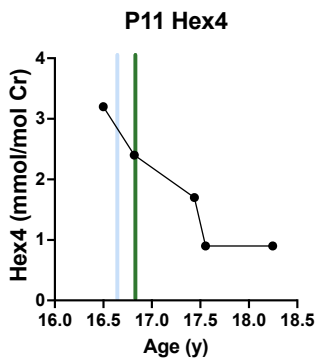

**P11 Antibodies**

|                        |
|------------------------|
| 17.8 y: 102,400 (Aval) |
| 18.1 y: 51,200 (Aval)  |
| 18.5 y: 25,600 (Aval)  |

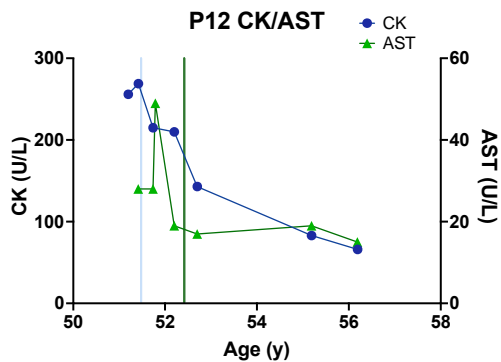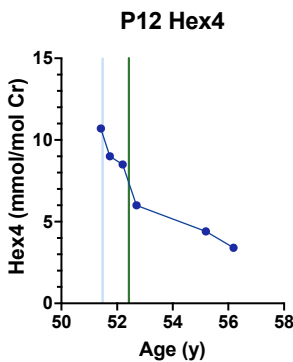

**P12 Antibodies**

|                    |
|--------------------|
| 51.7 y: 200 (AI)   |
| 52.2 y: 800 (AI)   |
| 52.7 y: 400 (AI)   |
| 55.2 y: Neg (Aval) |
| 56.2 y: Neg (Aval) |

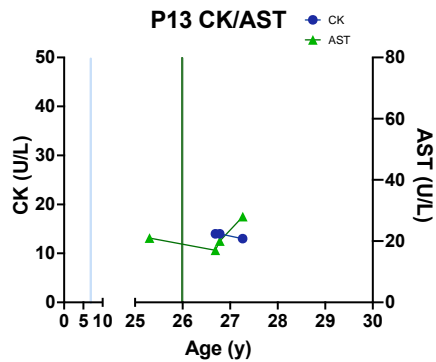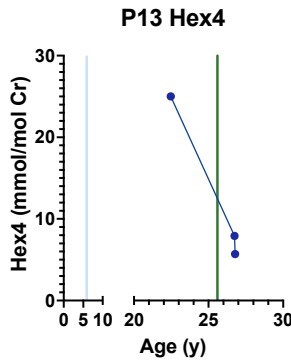

**Antibodies**

|                    |
|--------------------|
| 26.8 y: Neg (Aval) |
|--------------------|

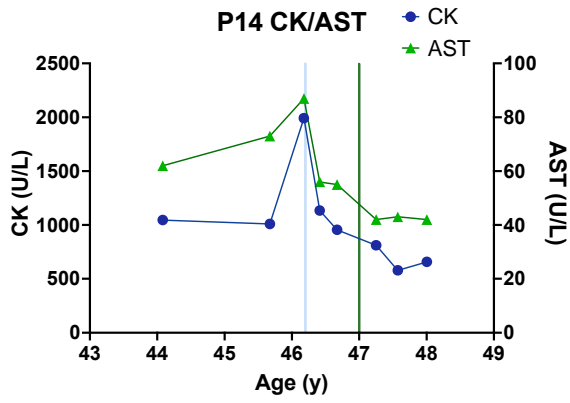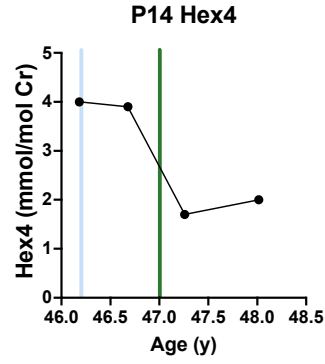

**Antibodies**  
**46.7 y:** 6,400 (AI)  
**47.3 y:** 12,800 (Aval)  
**48.0 y:** 25,600 (Aval)

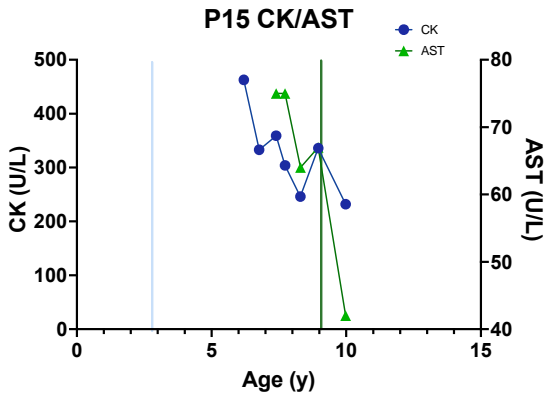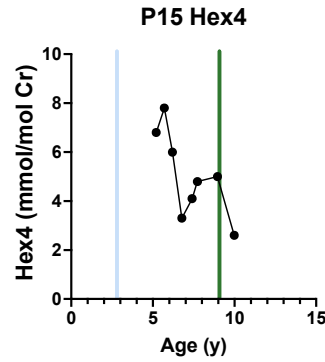

**Antibodies**  
**10.0 y:** Neg (Aval)

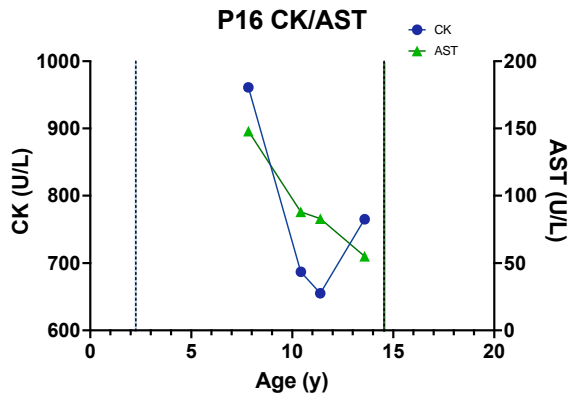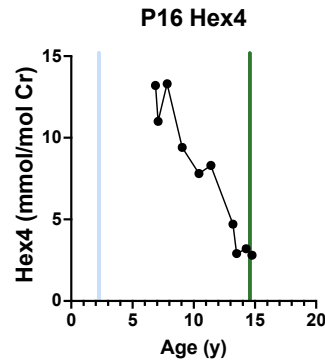

**Antibodies**  
**7.8 y:** 200 (AI)  
**10.4 y:** <100 (AI)  
**11.4 y:** 200 (AI)

1.2.2 **Supplementary Figure 2.** Six-Minute Walk Test (6MWT). Above: an overview of 6MWT percent-predicted at evaluations before and after the switch. Colors are based on baseline GSGC level of functional impairment [mildly impaired in green (n=6), moderately impaired in yellow (n=2), and severely impaired in red (n=4)]. Below: full data of individual scores over time. Color-coded vertical bars represent the starting points of ERT regimens, as described in Figures 1 and 3.

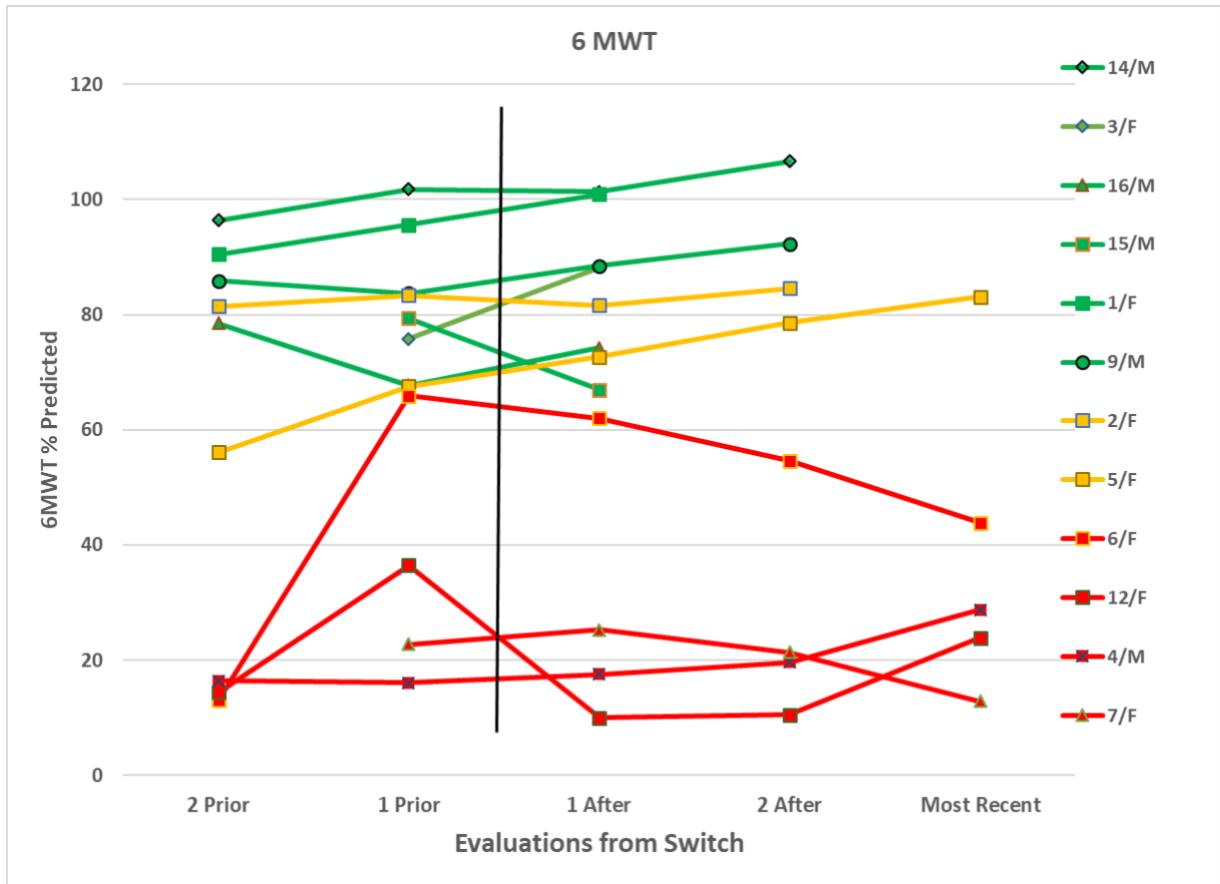

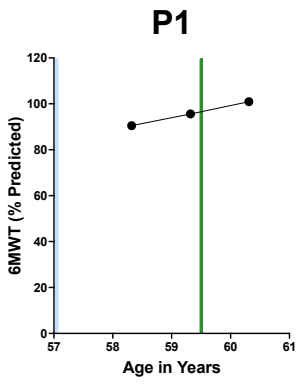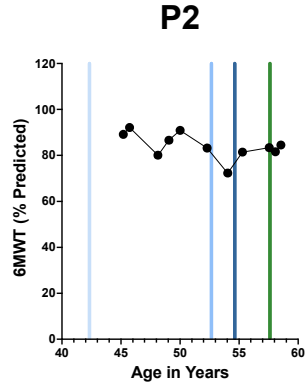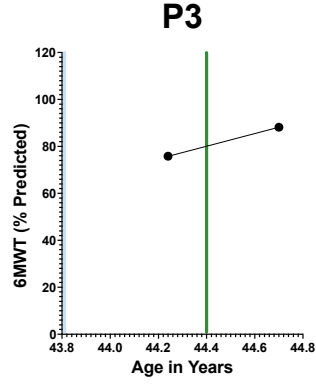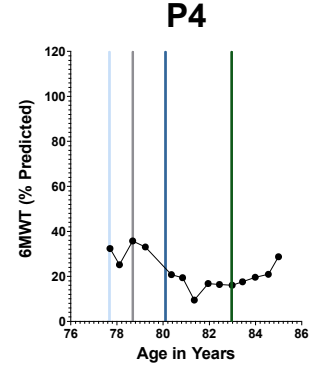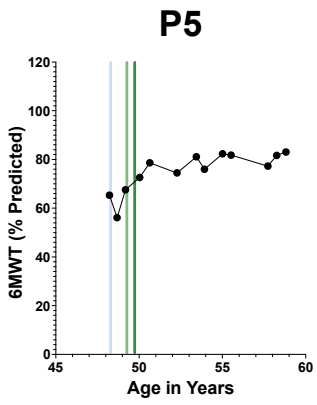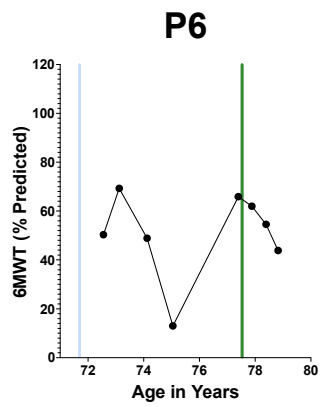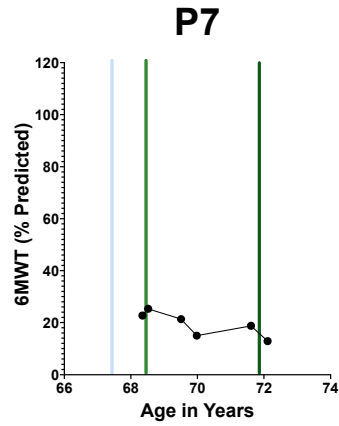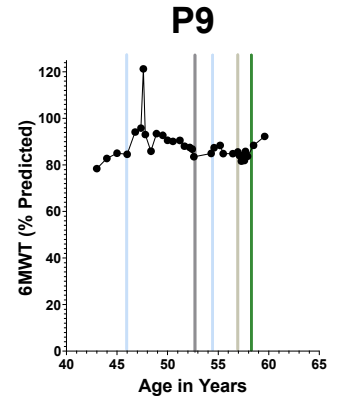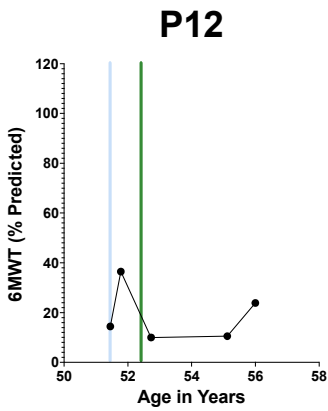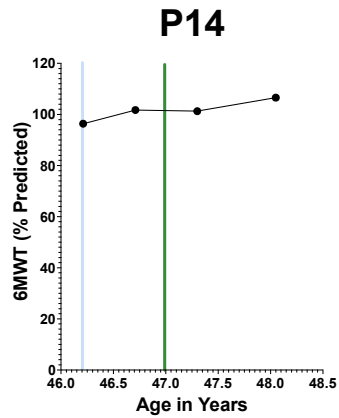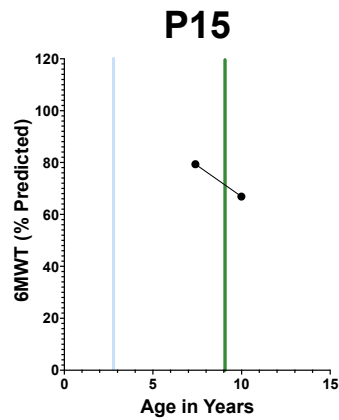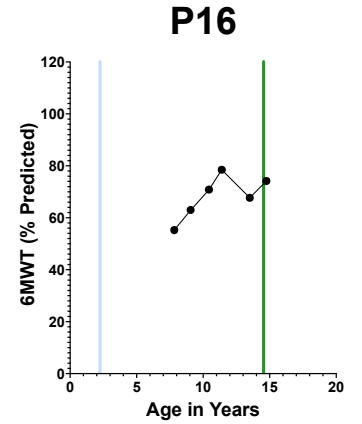

1.2.3 **Supplementary Figure 3.** Gait, Stairs, Gower, Chair (GSGC). Above: an overview of GSGC scores at timepoints before and after the switch. For patients seen more than twice after the switch, the most recent score was used for the last time point. GSGC scores range from 4 to 27 with score of 4 indicating normal function. Colors are based on baseline GSGC level of functional impairment [mildly impaired in green (n=6), moderately impaired in yellow (n=2), and severely impaired in red (n=4)]. Below: full data of individual scores over time. Color-coded vertical bars represent the starting points of ERT regimens, as described in Figures 1 and 3.

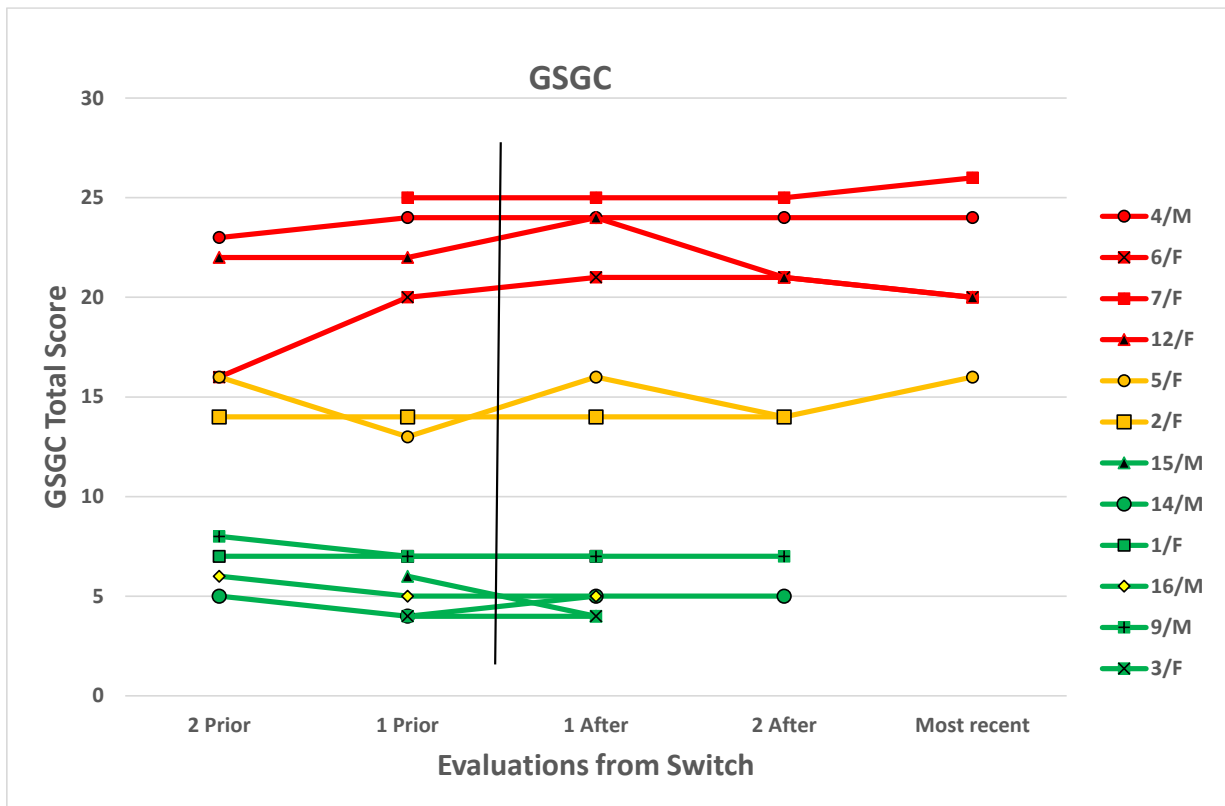

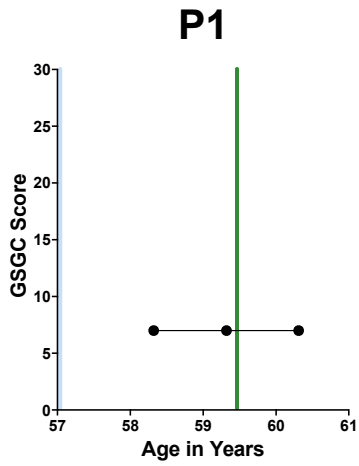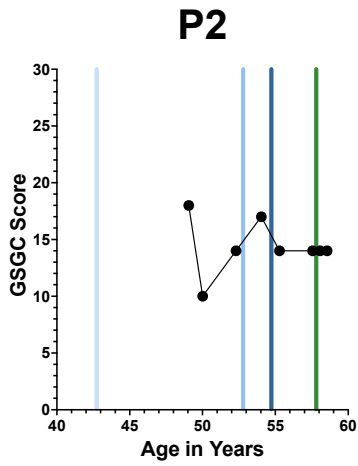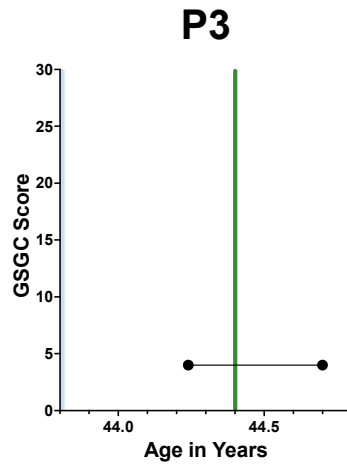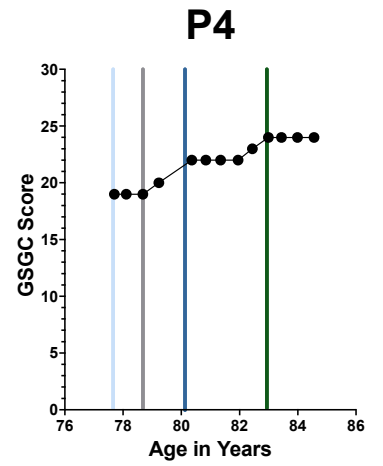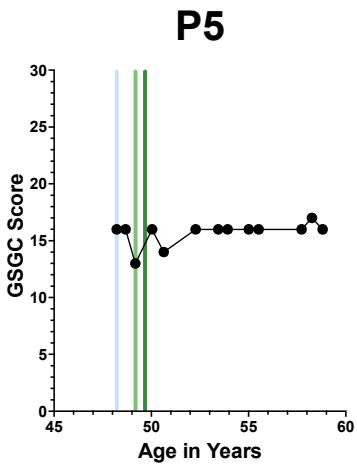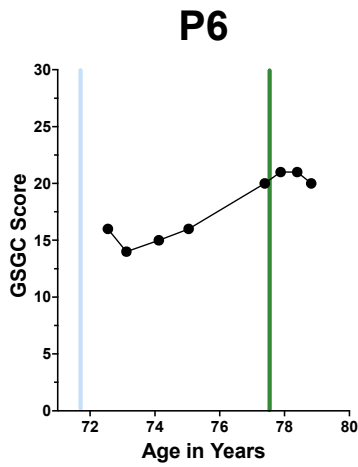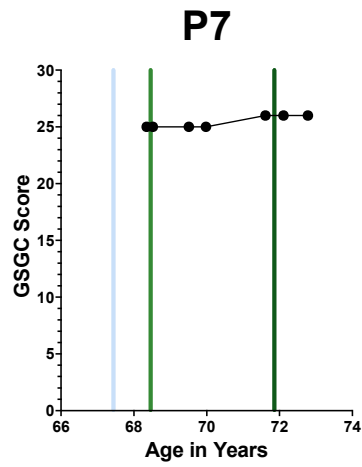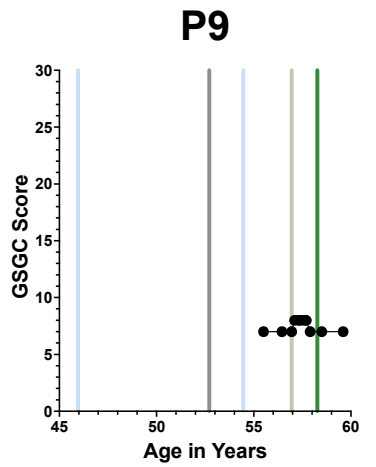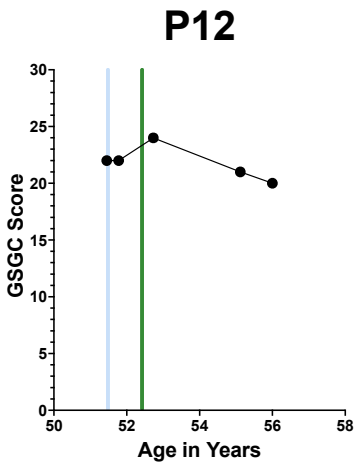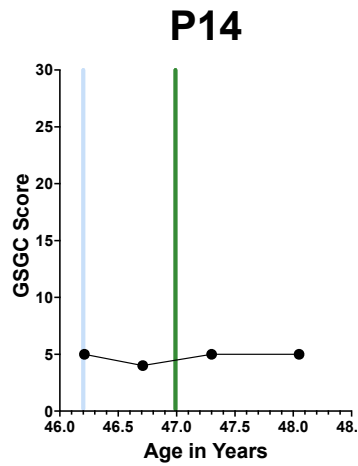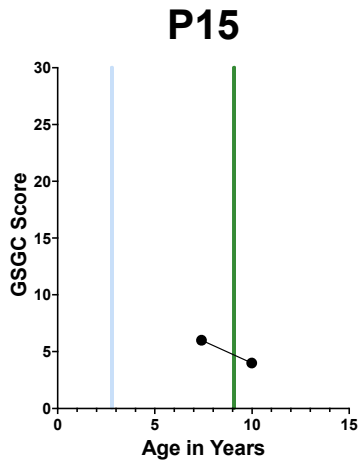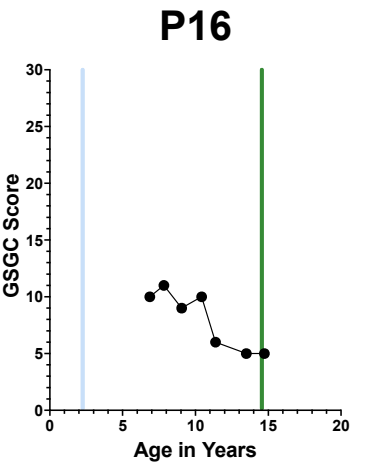

1.2.4 **Supplementary Figure 4.** Comfortable Gait Speed. Gait speed expressed in meters per second at timepoints before and after the switch. Colors are based on baseline GSGC level of functional impairment [mildly impaired in green (n=6), moderately impaired in yellow (n=2), and severely impaired in red (n=4)]. The minimal detectable change used for gait speed was 0.15 m/s.

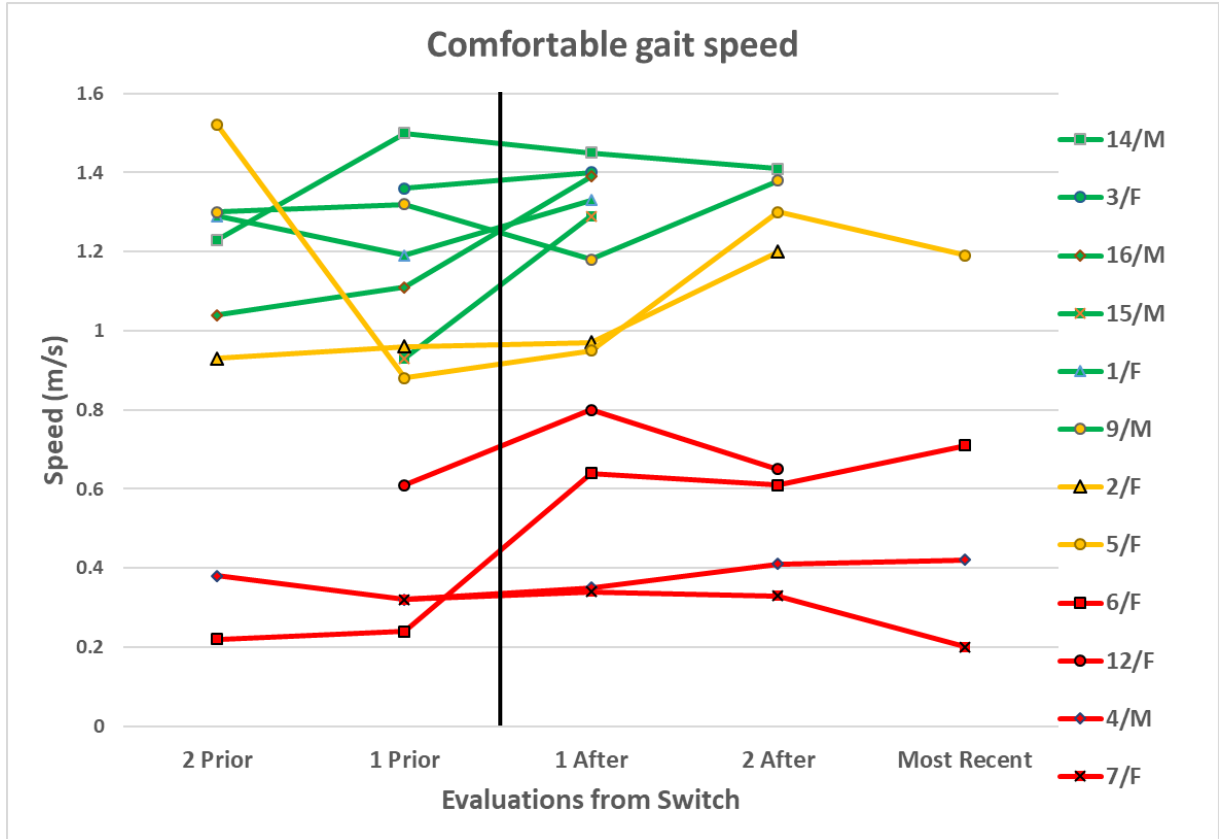



**1.2.5 Supplementary Figure 5 (A-E).** Gait Speed, Gowers (supine to stand), and Chair (sit to stand) comparisons and paired t-tests for timed values from baseline (pre) to most recent assessment or best post-switch assessment after switching to avalglucosidase alfa.

Overall, there were trends toward improvement in mean comfortable gait speed, fast gait speed, supine to stand (Gowers), and sit to stand (Chair) at the most recent and best post-switch assessments. The mean increase in comfortable gait speed and fast gait speed was statistically significant at both most recent and best post-switch assessments at an alpha level of 0.05. The mean Gowers (supine to standing) and sit to stand both showed statistically significant improvements at an alpha level of 0.05 only when comparing pre-switch values to best post-switch values.

In the 6MWT (not depicted here), there was a trend towards improvement when comparing pre-switch values to the best post-switch performances, but it was not statistically significant.

**A. Self-Selected Gait Speed – Pre vs most recent.** The mean self-selected (comfortable) gait speed was faster post-switch for both most recent and best post-switch visits (mean 0.90 m/s pre-switch, 1.03 m/s at most recent and 1.07 m/s at best post-switch visit), showing a statistical significance at the alpha level of 0.05 at most recent and best post-switch assessments, analyzed with paired t-tests.

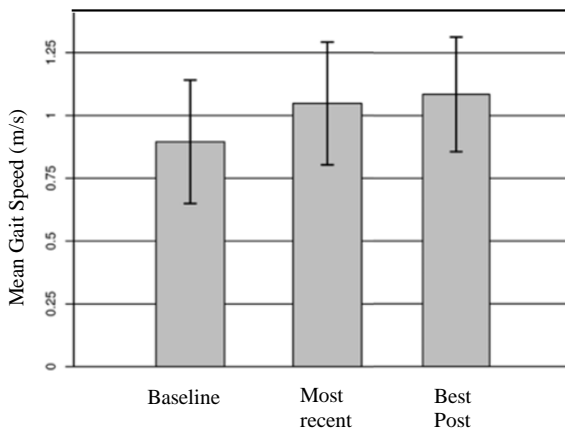

| Self-selected (Comfortable) gait speed - pre |           | Self-selected (Comfortable) gait speed - most recent |           | <i>t</i> | <i>p</i> | <i>d</i> |
|----------------------------------------------|-----------|------------------------------------------------------|-----------|----------|----------|----------|
| <i>M</i>                                     | <i>SD</i> | <i>M</i>                                             | <i>SD</i> |          |          |          |
| 0.90                                         | 0.43      | 1.05                                                 | 0.43      | -2.91    | .014     | 0.84     |

*Note.* N = 12. Degrees of Freedom for the *t*-statistic = 11. *d* represents Cohen's *d*.

| Self-selected (Comfortable) gait speed - pre |           | Self-selected (Comfortable) gait speed - best |           | <i>t</i> | <i>p</i> | <i>d</i> |
|----------------------------------------------|-----------|-----------------------------------------------|-----------|----------|----------|----------|
| <i>M</i>                                     | <i>SD</i> | <i>M</i>                                      | <i>SD</i> |          |          |          |
| 0.90                                         | 0.43      | 1.08                                          | 0.40      | -3.92    | .002     | 1.13     |

*Note.* N = 12. Degrees of Freedom for the *t*-statistic = 11. *d* represents Cohen's *d*.

**B. Fast gait speed -** The mean fast gait speed was faster post-switch for both most recent and best post-switch visits (mean 2.13 m/s pre-switch, 2.48 m/s at most recent and at best post-switch visit), showing a statistical significance at the alpha level of 0.05, analyzed with paired t-tests.

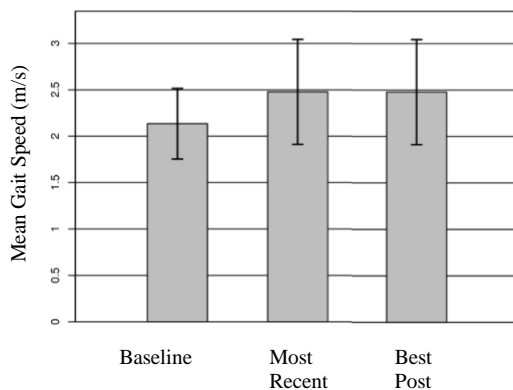

| Fast gait speed - pre |           | Fast gait speed - most recent |           | <i>t</i> | <i>p</i> | <i>d</i> |
|-----------------------|-----------|-------------------------------|-----------|----------|----------|----------|
| <i>M</i>              | <i>SD</i> | <i>M</i>                      | <i>SD</i> |          |          |          |
| 2.13                  | 0.51      | 2.48                          | 0.76      | -2.58    | .042     | 0.98     |

*Note.* N = 7. Degrees of Freedom for the *t*-statistic = 6. *d* represents Cohen's *d*.

| Fast gait - pre |           | Fast gait - best |           | <i>t</i> | <i>p</i> | <i>d</i> |
|-----------------|-----------|------------------|-----------|----------|----------|----------|
| <i>M</i>        | <i>SD</i> | <i>M</i>         | <i>SD</i> |          |          |          |
| 2.13            | 0.51      | 2.48             | 0.76      | -2.58    | .042     | 0.98     |

*Note.* N = 7. Degrees of Freedom for the *t*-statistic = 6. *d* represents Cohen's *d*.

C. Gowers (supine to stand) – Pre vs best post-switch (t-tests)

Mean time to rise from supine to standing (Gowers) was faster post-switch (mean 7.85s pre-switch vs 7.02s at most recent and 6.61s at best post-switch), but was only statistically significant at an alpha level of .05 for the best post-switch visit, analyzed with paired t-tests.

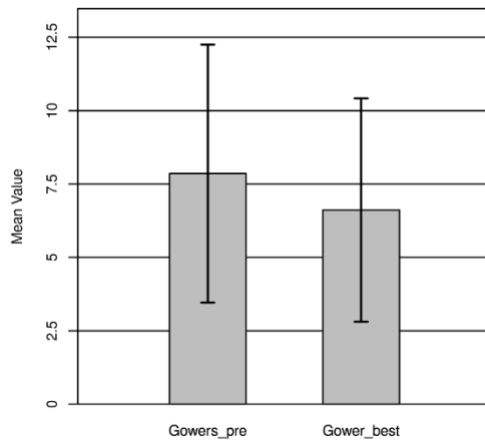

| Gowers - pre |           | Gower - best |           | <i>t</i> | <i>p</i> | <i>d</i> |
|--------------|-----------|--------------|-----------|----------|----------|----------|
| <i>M</i>     | <i>SD</i> | <i>M</i>     | <i>SD</i> |          |          |          |
| 7.85         | 6.34      | 6.61         | 5.49      | 2.42     | .046     | 0.85     |

*Note.* N = 8. Degrees of Freedom for the *t*-statistic = 7. *d* represents Cohen's *d*.

D. Chair (sit to stand) – Pre vs best post-switch (t-tests)

Mean time to perform sit to stand task was faster post-switch (mean 2.39 s pre-switch vs 2.02 s at most recent and 1.58 s at best post-switch) but was only statistically significant at an alpha level of .05 for the best post-switch visit, analyzed with paired t-tests and a two-tailed Wilcoxon signed rank test.

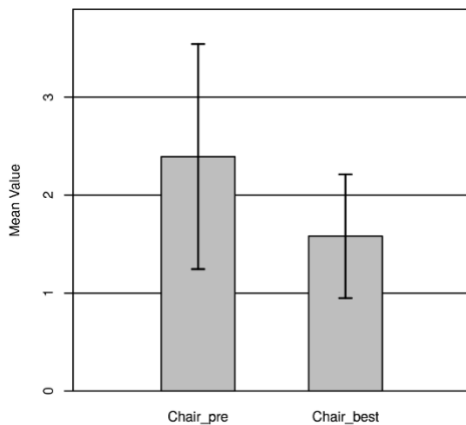

| Chair - pre |           | Chair - best |           | <i>t</i> | <i>p</i> | <i>d</i> |
|-------------|-----------|--------------|-----------|----------|----------|----------|
| <i>M</i>    | <i>SD</i> | <i>M</i>     | <i>SD</i> |          |          |          |
| 2.39        | 1.85      | 1.58         | 1.02      | 2.88     | .018     | 0.91     |

*Note.* N = 10. Degrees of Freedom for the *t*-statistic = 9. *d* represents Cohen's *d*.

E. Chair (sit to stand) – Pre vs best post-switch (two-tailed Wilcoxon signed rank test)

A two-tailed Wilcoxon signed rank test, a non-parametric alternative to the paired samples t-test which does not share its distributional assumptions, was used because the normality assumption was violated, and was also significant based at best post-switch at an alpha value of .05,  $V = 54.00$ ,  $z = -2.70$ ,  $p = .007$  which indicates that the differences are not likely due to random variation.

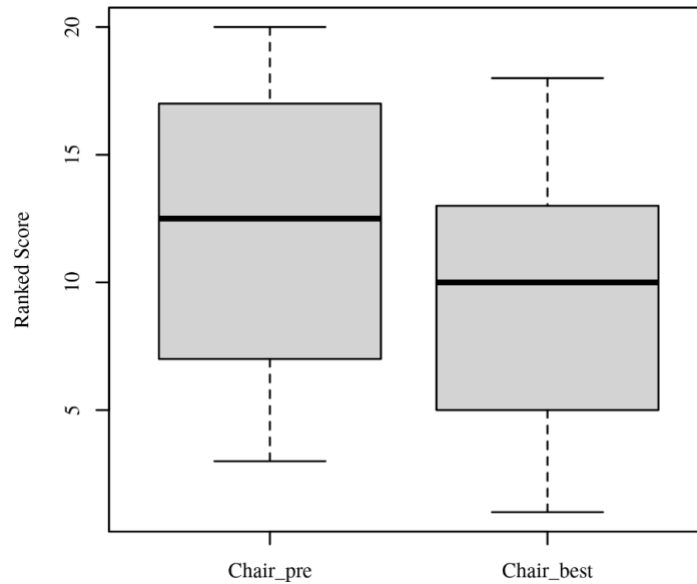

Supplement: DataSheet1.pdf [file DataSheet1.pdf]
